# Supplementary material for: Tungsten addenda mixed heteropolymolybdates supported on functionalized graphene for high-performance aqueous supercapacitors
Source: Royal Society of Chemistry journal article supplement (doi:10.1039/c6ra15381j), 2016-01-01
Supplement: c6ra15381j1.pdf [file c6ra15381j1.pdf]

## Electronic Supplementary Information

# Tungsten addenda mixed heteropolymolybdates supported on functionalized graphene for high-performance aqueous supercapacitors

Yan-Hong Ding, Jun Peng\*, Hai-Yang Lu, Yue Yuan, Shifa-Ullah Khan

*Key Laboratory Polyoxometalate Science of Ministry of Education, Faculty of Chemistry, Northeast of Normal University, Chang Chun, Jilin 130024, People's Republic of China*

### **PMo<sub>12-x</sub>W<sub>x</sub>**

To verify the successful combination of PMo<sub>12</sub> and PW<sub>12</sub> aqueous mixtures into PMo<sub>12-x</sub>W<sub>x</sub> (PMoW), a series of measurements were analyzed and a dry mixture was prepared by physical grinding for comparison.

Fig. S1a shows the FT-IR spectra of the products. The characteristic vibrational modes of pure PMo<sub>12</sub> are P–O: 1064.17 cm<sup>-1</sup>, Mo=O: 960.46 cm<sup>-1</sup>, Mo–O–Mo :870.56, 782.27 cm<sup>-1</sup> and pure PW<sub>12</sub> are corresponding to P–O: 1080.36 cm<sup>-1</sup>, W=O: 982.21 cm<sup>-1</sup>, W–O–W :891.30, 796.27 cm<sup>-1</sup>. Obviously, the solution-mixed PMoW retains the Keggin structure with peaks at P–O: 1067.97 cm<sup>-1</sup>,

M=O (M=Mo/W): 968.01  $\text{cm}^{-1}$ , M–O–M (M=Mo/W): 875.31, 790.94  $\text{cm}^{-1}$ .

This is very different from the physical-grinded mixture which the peaks are the simple superposition of  $\text{PMo}_{12}$  and  $\text{PW}_{12}$ . It indicates that the solution-mixed product is not just a simple physical combination of PMo and PW.

The X-ray diffraction (XRD) analysis further explains the chemical change and formation of mixed addenda molecules (Fig. S1b). The typical Keggin structure is retained in both mixtures, but several peaks (marked in the figure) are absent from the solution-prepared PMoW compared to the physical-grinded products, suggesting new chemicals with a Keggin structure are formed.<sup>1</sup>

The  $^{31}\text{P}$  liquid nuclear magnetic resonance (NMR) is an effective approach to confirm the formation of mixed addenda  $\text{PMo}_{12-x}\text{W}_x$ . As shown in Fig. S1c, the sharp peak signals at -4.14 ppm and -15.10 ppm correspond to pure PMo and pure PW, respectively.<sup>2</sup> Obvious chemical shift changes appear in the  $\text{PMo}_{12-x}\text{W}_x$  mixed chemicals (Fig. S1d). No  $\text{PW}_{12}$  signal peak is observed and the  $\text{PMo}_{12}$  signal fades off sharply, indicating the formation of new mixed addenda chemicals with tungsten substitution, which is in accord with the reported literature.<sup>3</sup> The strongest peak signals appeared at -7.23 and -8.24 ppm are corresponding to W-substituted chemicals  $\text{PMo}_9\text{W}_3$  and  $\text{PMo}_8\text{W}_4$  molecules.<sup>4</sup> There are also several other peaks located at -5.24, -6.29, -9.13, and -10.21 ppm,

corresponding to  $\text{PMo}_{11}\text{W}$ ,  $\text{PMo}_{10}\text{W}_2$ ,  $\text{PMo}_7\text{W}_5$  and  $\text{PMo}_6\text{W}_6$ , respectively.<sup>3, 4</sup>

The mixed addenda POMs can be reproducibly obtained and are promising pseudocapacitive electrode materials for energy storage.

**Fig. S1**

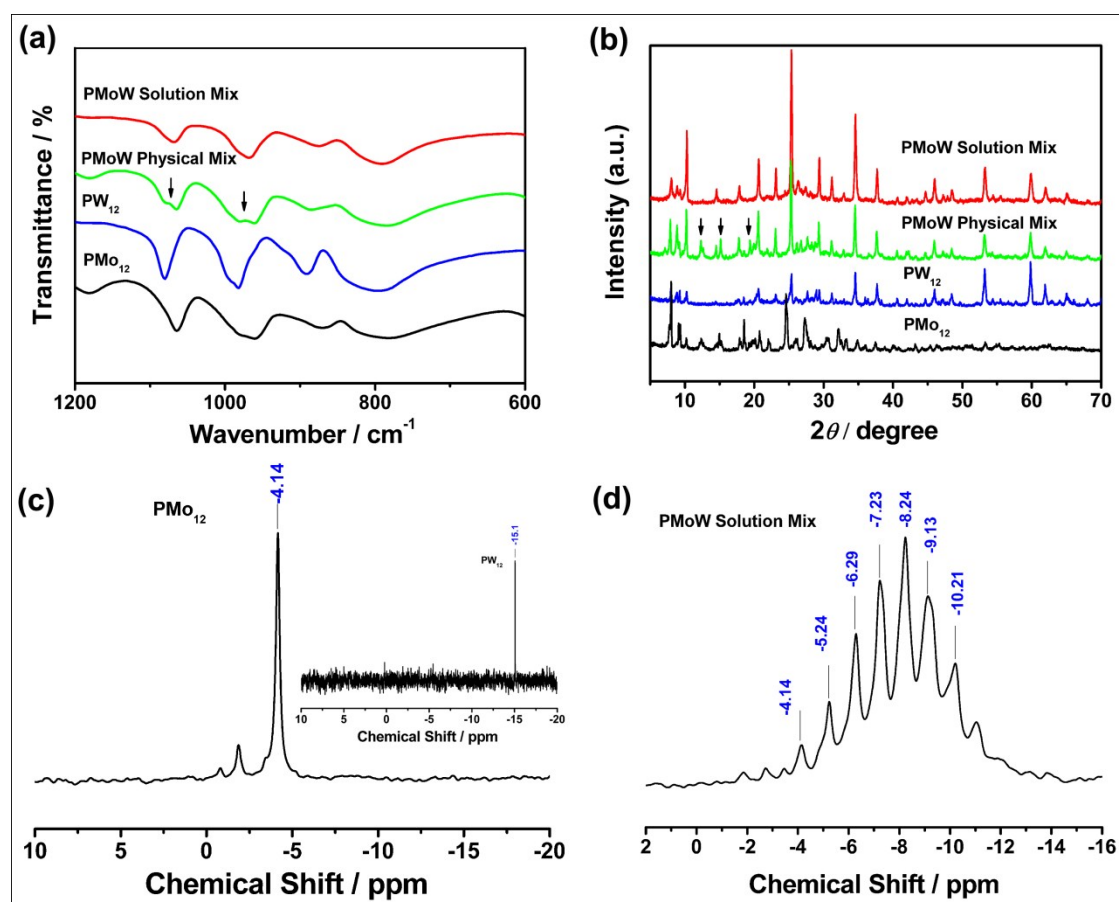

**Fig. S1** (a) The FT-IR spectra of pure  $\text{PMo}_{12}$ ,  $\text{PW}_{12}$ , PMoW physical mix and PMoW solution mix. (b) The XRD patterns of pure  $\text{PMo}_{12}$ ,  $\text{PW}_{12}$ , PMoW physical mix and PMoW solution mix. (c)  $^{31}\text{P}$  NMR spectra of pure PMo and pure PW. (d)  $^{31}\text{P}$  NMR spectra of the PMoW solution mix.

**Fig. S2**

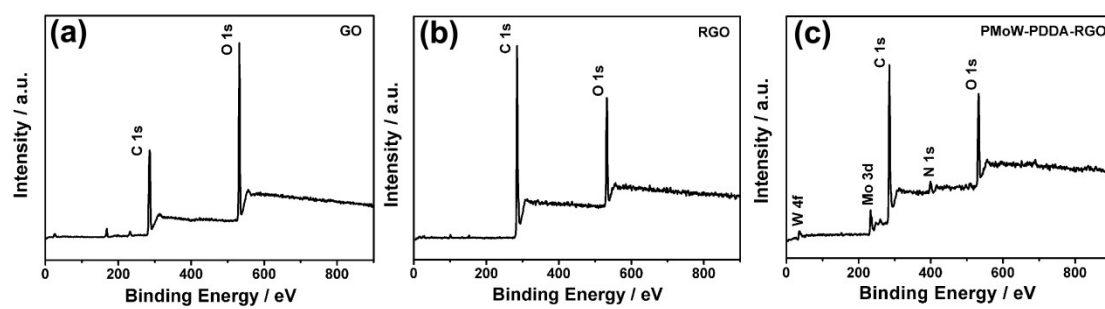

Fig. S2 (a-c) XPS of GO, RGO, and the PMoW-PDDA-RGO composite.

Fig. S3

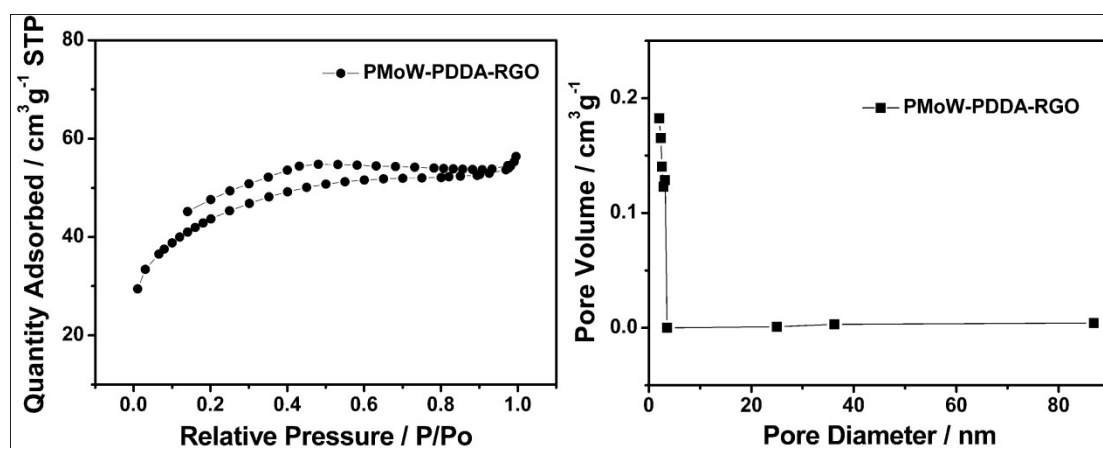

Fig. S3 (a) N<sub>2</sub> adsorption –desorption isotherm and (b) pore size distribution of the PMoW-PDDA-RGO composite.

Fig. S4

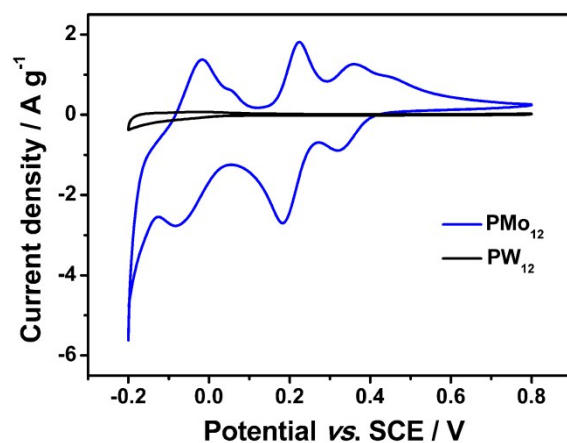

Fig. S4 CV curves of PMo<sub>12</sub> and PW<sub>12</sub> at 10 mV s<sup>-1</sup>.

1. M. Genovese, Y. W. Foong and K. Lian, *Journal of the Electrochemical Society*, 2015, **162**, A5041-A5046.
2. R. Massart, R. Contant, J. M. Fruchart, J. P. Ciabrini and M. Fournier, *Inorganic Chemistry*, 1977, **16**, 2916-2921.
3. M. Genovese, Y. W. Foong and K. Lian, *Electrochimica Acta*, 2016, **199**, 261-269.
4. T. Ueda, T. Toya and M. Hojo, *Inorganica Chimica Acta*, 2004, **357**, 59-65.
